# Supplementary material for: Quality of life after surgical resection compared with radiofrequency ablation for small hepatocellular carcinomas
Source: Oxford University Press journal article supplement (doi:10.1002/bjs.9539), 2014-05-27
Supplement: bjs9539-sup-0003-figures3.doc [file bjs9539-sup-0003-figures3.doc]

**
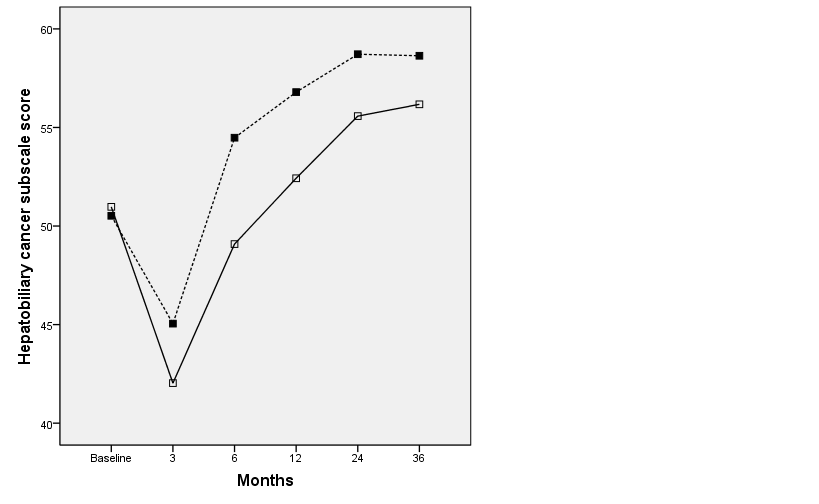
Fig. S3** Change in Functional Assessment of Cancer Therapy – Hepatobiliary (FACT-Hep) hepatobiliary cancer subscale scores from baseline to 36 months after percutaneous radiofrequency ablation (RFA; 121 patients) or surgical resection (dotted line, RFA; solid line, resection)
