# Supplementary material for: Quality of life after surgical resection compared with radiofrequency ablation for small hepatocellular carcinomas
Source: Oxford University Press journal article supplement (doi:10.1002/bjs.9539), 2014-05-27
Supplement: bjs9539-sup-0004-figures4.doc [file bjs9539-sup-0004-figures4.doc]

*
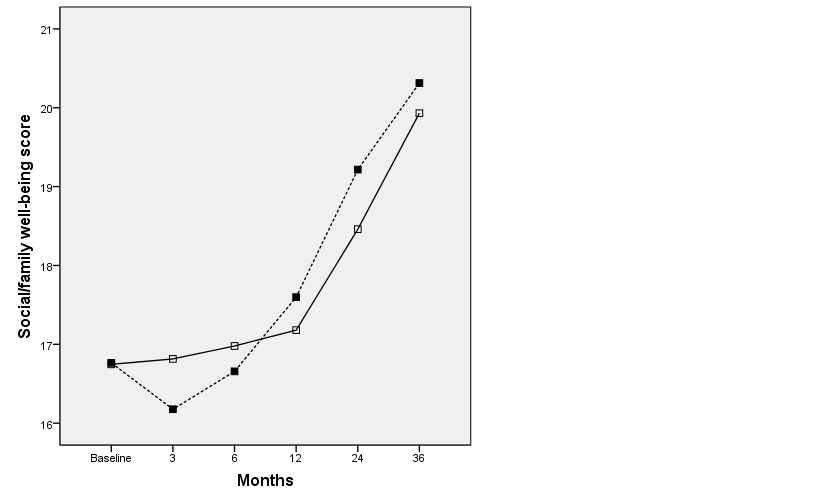
*

**Fig. S4** Change in Functional Assessment of Cancer Therapy – Hepatobiliary (FACT-Hep) social/family well-being scores from baseline to 36 months after percutaneous radiofrequency ablation (RFA; 121 patients) or surgical resection (225 patients) (dotted line, RFA; solid line, resection)
