# Supplementary material for: Quality of life after surgical resection compared with radiofrequency ablation for small hepatocellular carcinomas
Source: Oxford University Press journal article supplement (doi:10.1002/bjs.9539), 2014-05-27
Supplement: bjs9539-sup-0006-tables1.doc [file bjs9539-sup-0006-tables1.doc]

**Table S1** Comparison of preoperative and postoperative assessments of health-related quality of life using the FACT-Hep questionnaire

|  | RFA  (*n* = 121) | Resection  (*n* = 225) | *P** |
| --- | --- | --- | --- |
| Physical well-being  Baseline  3 months  6 months  12 months  24 months  36 months | 21.3(2.6)  19.1(2.8)  20.9(1.9  21.6(2.2)  22.5(2.6)  23.1(1.8) | 21.2(2.6)  14.7(3.2)  18.4(3.1)  20.4(2.3)  21.7(2.2)  22.5(1.9) | 0.663  < 0.001  < 0.001  < 0.001  0.002  0.009 |
| Social/family well-being  Baseline  3 months  6 months  12 months  24 months  36 months | 16.7(2.6)  16.2(2.1)  16.5(2.0)  17.5(2.6)  19.0(3.3)  20.3(3.5) | 16.7(3.3)  16.6(3.3)  16.8(3.1)  17.2(2.9)  18.5(3.5)  19.9(3.7) | 0.943  0.150  0.343  0.411  0.153  0.359 |
| Emotional well-being  Baseline  3 months  6 months  12 months  24 months  36 months | 14.9(2.2)  16.0(2.3)  16.4(2.5)  17.0(3.0)  17.5(3.2)  18.7(3.4) | 14.7(2.4)  15.2(2.5)  16.1(2.4)  16.6(2.7)  17.1(2.7)  18.6(2.5) | 0.633  0.008  0.323  0.223  0.307  0.687 |
| Functional well-being  Baseline  3 months  6 months  12 months  24 months  36 months | 18.7(2.0)  15.2(1.3)  17.6(2.6)  19.4(3.3)  20.8(3.5)  21.9(4.2) | 18.9(2.2)  12.7(2.3)  15.5(3.1)  17.3(2.9)  19.4(3.5)  20.8(3.3) | 0.476  < 0.001  < 0.001  < 0.001  0.001  0.014 |
| Hepatobiliary cancer subscale  Baseline  3 months  6 months  12 months  24 months  36 months | 49.8(5.7)  44.5(4.3)  52.3(7.2)  54.0(10.6)  56.5(11.5)  58.6(10.3) | 50.2(5.3)  41.2(3.9)  47.6(5.8)  50.4(7.9)  53.4(10.1)  56.2(8.6) | 0.600  < 0.001  < 0.001  < 0.001  0.011  0.031 |
| Trial outcome index  Baseline  3 months  6 months  12 months  24 months  36 months | 89.8(6.9)  78.8(5.8)  90.8(9.7)  93.2(18.7)  99.9(16.4)  103.6(14.9) | 90.2(6.4)  68.6(6.4)  81.4(9.3)  86.2(16.0)  94.4(14.0)  99.4(11.8) | 0.624  < 0.001  < 0.001  < 0.001  0.002  0.009 |
| FACT-Hep total score  Baseline  3 months  6 months  12 months  24 months  36 months | 121.4(7.6)  110.6(6.9)  123.7(11.8)  127.6(21.7)  136.3(20.6)  142.6(20.4) | 121.6(8.0)  100.5(8.4)  114.3(11.3)  120.0(17.9)  130.0(16.3)  137.9(14.9) | 0.775  < 0.001  < 0.001  0.001  0.003  0.025 |

Values are mean(s.d.). RFA, radiofrequency ablation. *Student’s *t* test.
